# Supplementary material for: Isotopic variance among plant lipid homologues correlates with biodiversity patterns of their source communities
Source: PLoS One. 2019 Feb 27;14(2):e0212211. doi: 10.1371/journal.pone.0212211 (PMC6392421; doi:10.1371/journal.pone.0212211)
Supplement: S1 Table — (XLS) [file pone.0212211.s002.xls]

## Sheet: Sheet1 Updated
**		**		**		**			**					**			**			**			**		**		**		**
	SI Table 1: Median and median absolute deviation (MAD) values of C27–C33 n-alkane δ13C data and LEWIS index values in contemporary plant leaves in three overarching plant functional types (PFTs) for savannahs30: C3 woody plants (n = 42), C3 forbs (n = 22), and C4 grasses (n = 75)(Rommerskirchen et al. 2006, Vogts et al. 2009, Cryer 2012, Bezabih et al. 2011ab, Badewien et al. 2015). Important tax…
	In accordance with convention, average chain length (ACL) and weighted-mean average δ13C (δ13CWMA) were characterized:
		ACL = Σ{(x Cx) / Cx}
		δ13CWMA = Σ{(δ13Cx×Cx ) / Cx}
	Nomenclature refers to the concentration (Cx) or composition (δ13Cx) of an n-alkane homologue with x carbons.
	n.d., not determined
	Family		Subfamily		Tribe		Genus	Species		Ref.		Heptacosane (n-C27)			Nonacosane (n-C29)			Triacontane (n-C31)			Tritriacontane (n-C33)			δ13CWMA		ACL27-33		LEWIS
												% Rel. Abund.	δ13C		% Rel. Abund.	δ13C		% Rel. Abund.	δ13C		% Rel. Abund.	δ13C		δ13C
													(‰ vs. VPDB)			(‰ vs. VPDB)			(‰ vs. VPDB)			(‰ vs. VPDB)		(‰ vs. VPDB)
	Poaceae		Aristidoideae		Aristideae		Aristida	adscensionis		Bezabih et al. (2011b)		7	-22.49		18	-22.7		51	-22.7		23	-23.3		-22.8257		30.8182		0.81
										Rommerskirchen et al. (2006)		16.3355	-23		18.9845	-24.9		37.3068	-25.3		27.3731	-23.8		-24.4377		30.5143		2.3
										Cryer (2012)		4.07119	-22.951		15.0767	-22.592		69.861	-21.489		10.9911	-21.859		-21.7555		30.7554		1.462
								barbicollis		Rommerskirchen et al. (2006)		5.17241	-20		18.1034	-21.4		37.931	-22.4		38.7931	-22.1		-21.9784		31.2069		2.4
								congesta		Rommerskirchen et al. (2006)		14.7619	-22.4		18.5714	-22.9		37.1429	-24.3		29.5238	-24		-23.671		30.6286		1.9
								graciflora		Rommerskirchen et al. (2006)		3.87097	-25.6		9.67742	-23.9		50.3226	-24.1		36.129	-23.9		-24.0665		31.3742		1.7
								meridionalis		Rommerskirchen et al. (2006)		12.3711	-21.4		31.9588	-22.4		35.0515	-22.8		20.6186	-22.4		-22.4165		30.2784		1.4
										Rommerskirchen et al. (2006)		24.8322	-20.8		29.5302	-21.4		26.8456	-21.9		18.7919	-22.7		-21.6295		29.7919		1.9
							Stipagrostis	sp.		Rommerskirchen et al. (2006)		37.037	-22.7		16.6667	-21.7		24.0741	-19.8		22.2222	-20.7		-21.3907		29.6296		2.9
										Rommerskirchen et al. (2006)		14.0578	-25.3		29.8106	-25		32.7019	-23.2		23.4297	-24		-24.2192		30.3101		2.1
										Rommerskirchen et al. (2006)		30.3226	-23.2		22.5806	-24.5		30.3226	-25.9		16.7742	-24		-24.4465		29.671		2.7
			Chloridoideae		Cynodonteae		Chloris	gayana		Bezabih et al. (2011a)		14.1983	-21.37		15.2999	-21.55		38.9229	-21.1		31.5789	-22.3		-21.5861		30.7576		1.2
								sp.		This Study		18.8437	-20.3302		27.3451	-21.7762		30.3702	-20.0809		23.441	-20.7		-20.7366		30.1682		1.69534
										This Study		10.2406	-20.6444		13.2251	-20.026		56.8551	-19.6174		19.6792	-20.0819		-19.868		30.7195		1.02704
										This Study		6.30337	-21		12.2382	-23.8199		36.3111	-22.4		45.1473	-22.9		-22.7113		31.406		2.81987
								gayana		Rommerskirchen et al. (2006)		6.69643	-23		18.75	-22.5		28.125	-23.4		46.4286	-24.9		-23.9009		31.2857		2.4
								virgata		Rommerskirchen et al. (2006)		16.8067	-20.3		29.4118	-19.6		30.2521	-20.2		23.5294	-21.1		-20.2521		30.2101		1.5
										Rommerskirchen et al. (2006)		27.3504	-20.2		27.3504	-20.6		26.4957	-21.7		18.8034	-21.1		-20.8761		29.735		1.5
							Cynodon	dactaylon		Bezabih et al. (2011a)		13.617	-22.9		14.2553	-23.9		32.5532	-22.7		39.5745	-23.4		-23.1753		30.9617		1.2
								ethiopicus		Bezabih et al. (2011b)		10.6033	-23.44		18.83	-23.4		35.8318	-22.2		34.7349	-22.55		-22.679		30.894		1.24
								sp.		This Study		3.8956	-20.1099		8.67146	-22.1654		26.3504	-21.2		61.0825	-21.9		-21.6688		31.8924		2.05546
										This Study		3.53819	-19.798		8.83822	-21.6501		28.8092	-20.0864		58.8144	-20.442		-20.4235		31.858		1.85213
							Dactyloctenium	aegyptium		Bezabih et al. (2011b)		12.1563	-21.94		12.4457	-23.1		45.2967	-22.5		30.1013	-23.55		-22.8227		30.8669		1.61
							Eleusine	multiflora		Bezabih et al. (2011b)		12.0408	-22.25		15.3061	-23.1		37.9592	-23.65		34.6939	-25		-23.8656		30.9061		2.75
					Eragrostideae		Enneapogon	sp.		Rommerskirchen et al. (2006)		9.36556	-22.3		16.0121	-23		33.2326	-22.7		41.3897	-22.5		-22.6278		31.1329		0.7
								cenchroides		Rommerskirchen et al. (2006)		4.72973	-19.5		14.8649	-19.4		33.7838	-20.9		46.6216	-22.7		-21.45		31.4459		3.3
										Rommerskirchen et al. (2006)		32.5758	-19.5		21.9697	-18.3		28.0303	-20.1		17.4242	-20.1		-19.5091		29.6061		1.8
							Eragrostis	aspera		Bezabih et al. (2011a)		29.6	-21.09		30.4	-22.1		26.4	-21.95		13.6	-24.5		-22.0878		29.48		3.41
								cilianensis		Bezabih et al. (2011a)		11.3725	-21.86		14.7059	-22.3		36.2745	-23.3		37.6471	-24.3		-23.3656		31.0039		2.44
								nindensis		Rommerskirchen et al. (2006)		34.2593	-24.4		25	-22.7		19.4444	-24.6		21.2963	-24		-23.9287		29.5556		1.9
								superba		Rommerskirchen et al. (2006)		18.1818	-20.4		39.6104	-20.8		22.0779	-21.8		20.1299	-22.7		-21.3305		29.8831		2.3
								tremula		Rommerskirchen et al. (2006)		11.7647	-24		18.7166	-25.1		39.5722	-25.9		29.9465	-26.3		-25.6465		30.754		2.3
								violaceae		Rommerskirchen et al. (2006)		8.19672	-18		25.6831	-18.1		39.8907	-19.6		26.2295	-19.2		-18.9787		30.6831		1.6
								viscosa		Rommerskirchen et al. (2006)		18.2519	-20		29.563	-19.6		32.9049	-21.8		19.2802	-22.4		-20.9368		30.0643		2.8
								sp.		This Study		4.48907	-20		8.72658	-22.8367		38.4022	-20.8		48.3822	-21.4		-21.2321		31.6135		2.83672
										This Study		4.31491	-19.9		8.68671	-22.5902		38.4053	-20.7797		48.5931	-21.0629		-21.0367		31.6255		2.69021
					Zoyiseae		Sporobolus	pellucisus		Bezabih et al. (2011b)		22.0911	-21.05		19.14	-21.5		33.4739	-22.5		25.2951	-24.22		-22.4234		30.2395		3.17
								sp.		This Study		4.37513	-19.9972		10.74	-22.2298		34.7303	-20.8045		50.1546	-21.2		-21.1206		31.6133		2.23268
										This Study		16.6667	n.d.		24.2424	n.d.		31.8182	-20.6		27.2727	-20		n.d.		30.3939		0.6
										Rommerskirchen et al. (2006)		29.1667	n.d.		25	-20		20.8333	-19.6		25	-18.9		n.d.		29.8333		1.1
										This Study		3.93613	-21.1		15.2012	-23		47.666	-22.1		33.1966	-22.3		-22.2638		31.2025		1.9
										This Study		3.92452	-21		15.1024	-22.8		47.8735	-22.1		33.0995	-22.6		-22.328		31.203		1.8
								ioclados		Rommerskirchen et al. (2006)		11.7318	-19.9		18.9944	-21.8		32.9609	-22.4		36.3128	-22		-21.8475		30.8771		2.5
								pyramidalis		Rommerskirchen et al. (2006)		8.45921	-21.2		27.1903	-22		33.5347	-22.1		30.8157	-22.7		-22.1816		30.7341		1.5
			Panicoideae		Andropogonea		Cymbopogon	pospischlii		Bezabih et al. (2011b)		20.6731	-20.61		31.7308	-20.4		37.9808	-20.8		10	-22.55		-20.8021		29.7308		2.15
							Heteropogon	contorus		Bezabih et al. (2011b)		11.0032	-19.46		7.44337	-20.1		43.0421	-20.45		38.5113	-21.1		-20.5653		31.1812		1.64
							Hypharrhenia	anamesa		Bezabih et al. (2011b)		12	-20.12		14.25	-19.75		58.25	-20		15.5	-21.7		-20.2423		30.545		1.95
							Themeda	triandra		This Study		7.7555	-20.9		20.467	-22.7		51.6721	-21.6		20.1054	-22		-21.8513		30.6825		1.8
										Rommerskirchen et al. (2006)		15.2542	-18.7		24.5763	-21.3		33.0508	-19.6		27.1186	-20		-19.989		30.4407		2.6
					Paniceae		Brachiaria	lachnantha		Bezabih et al. (2011b)		8	-20.81		12	-21.9		34.4	-21.3		45.6	-22.9		-22.0624		31.352		2.09
								marlothi		Bezabih et al. (2011b)		44.8745	-20.72		29.3933	-21.4		18.2008	-22.45		7.53138	-26.4		-21.6625		28.7678		5.68
								erucitormis		This Study		14.8649	-21.9		18.9189	-20.4		24.3243	-20.9		41.8919	-20.3		-20.7027		30.8649		1.6
										Rommerskirchen et al. (2006)		14.8515	-18.6		17.8218	-19.2		25.7426	-20.1		41.5842	-19.9		-19.6337		30.8812		1.5
								sp.		Rommerskirchen et al. (2006)		15.1515	-20.5		15.1515	-20.7		27.2727	-20.2		42.4242	-20		-20.2364		30.9394		0.7
							Cenchrus	ciliaris		Bezabih et al. (2011a)		4.875	-20.85		11	-21.1		48.875	-21.8		35.25	-21.9		-21.7119		31.29		1.05
							Digitaria	abyssinica		Bezabih et al. (2011b)		11.7834	-19.37		25.3185	-19.8		44.2675	-19.7		18.6306	-22.05		-20.1243		30.3949		2.68
								sp.		This Study		7.48717	-21.9177		9.97454	-23.1576		44.5098	-22.6587		38.0285	-23.0072		-22.7855		31.2616		1.23988
										This Study		7.41551	-21.4534		9.72723	-23.1992		44.5102	-22.5		38.3471	-23.0686		-22.7084		31.2758		1.74577
										This Study		2.48291	-19.2		6.5851	-19.4		62.3246	-20		28.6074	-22.2		-20.57		31.3411		3
								milanjiana		Rommerskirchen et al. (2006)		4.62428	-20.5		22.5434	-18.9		36.4162	-19.5		36.4162	-19.7		-19.4838		31.0925		1.6
							Melinis	repens		Bezabih et al. (2011b)		21.4876	-20.92		14.876	-21.9		34.9862	-21.3		28.6501	-21.8		-21.4509		30.416		0.98
							Panicum	sp.		Rommerskirchen et al. (2006)		16.208	-22.2		19.8777	-22.6		29.6636	-23		34.2508	-22.7		-22.6881		30.6391		0.8
								arbusculum		Rommerskirchen et al. (2006)		16.208	-24.1		15.9021	-22		20.7951	-24		47.0948	-21.4		-22.4737		30.9755		2.7
								maximum		Rommerskirchen et al. (2006)		14.5833	-20		29.8611	-20.8		36.1111	-19.4		19.4444	-22.3		-20.4694		30.2083		2.9
										Rommerskirchen et al. (2006)		19.8758	-24.7		21.7391	-24.2		32.9193	-24.5		25.4658	-24.8		-24.5509		30.2795		0.6
							Pennisetum	stranninium		Bezabih et al. (2011a)		4.4843	-20.69		14.574	-20.6		66.8161	-20.1		14.1256	-21.4		-20.383		30.8117		1.3
								polystachion		Bezabih et al. (2011b)		24.6914	-22.52		22.2222	-23.04		45.0617	-23.8		8.02469	-27.21		-23.5887		29.7284		4.69
								sp.		This Study		23.4675	-18.7		37.6685	-21.3		21.4292	-19.2725		17.4348	-19.6		-19.959		29.6566		2.6
										This Study		2.65225	-20.823		10.4126	-23.4093		50.8242	-21.9		36.111	-22.2		-22.1369		31.4079		2.58638
							Rynchelytum	repens		Bezabih et al. (2011b)		10.2709	-21.7		8.57788	-22.55		40.1806	-23		40.9707	-23.5		-23.0327		31.237		1.8
							Snowdenia	petitiana		Bezabih et al. (2011b)		5.44747	-21.97		15.7588	-23.1		47.6654	-23.7		31.1284	-25.2		-23.9781		31.0895		3.23
			-		-		-	sp.		Badewien et al. (2015)		7.83565	n.d.		21.5609	-25.788		47.2138	-22.638		23.3897	-21.946		-21.3815		30.7232		3.842
										Badewien et al. (2015)		11.1837	n.d.		23.0333	-20.392		20.8079	-21.271		44.975	-21.18		-18.6487		30.9915		0.879
										Badewien et al. (2015)		10.0639	n.d.		22.0558	-20.024		52.5203	-19.938		15.36	-23.22		-18.4545		30.4635		3.282
										Badewien et al. (2015)		11.4807	n.d.		26.8963	-19.737		33.4057	-20.054		28.2172	-20.046		-17.6641		30.5672		0.317
							Total	Median:				11.7647	-20.92		18.7166	-21.95		35.0515	-21.8		29.5238	-22.3		-21.7119		30.7554		1.9
							75	MAD:				5.04202	0.98		5.49143	1.15		6.92655	1.2		8.98752	1.12		1.07358		0.447522		0.66
	Anacardiaceae		Spondiadoideae		-		Sclerocarya	birrea		This study		n.d.	-28.4		n.d.	-28.7		n.d.	-31.3		n.d.	-34.8		n.d.		n.d.		2.9
	Burseraceae		-		Bursereae		Commiphora	glaucescens		This study		9.8692	-30.4		15.1308	-30.9		54.1023	-30.1		20.8977	-30.1		-30.2507		30.7206		0.8
								merkeri		This study		13.1818	-36		27.0455	-37.7		46.3636	-37.7		13.4091	-36.3		-37.2882		30.2		1.7
	Capparaceae		-		-		Boscia	foetida		This study		8.77259	n.d.		49.6988	-34.3		36.7093	-30.9		4.81928	-32.8		n.d.		29.7515		3.4
	Celastraceae		Celastroideae		-		Gymnosporia	buxifola		Vogts et al. (2009)		10.2552	-35.3		21.5777	-33.9		51.9722	-33.1		16.1949	-32.8		-33.4497		30.4821		2.5
	Combretaceae		Combretoideae		Combreteae		Combretum	apiculatum		This study		n.d.	-28.9		n.d.	-30.3		n.d.	-32.4		n.d.	-34.1		n.d.		n.d.		3.5
								imberbe		This study		30.3901	-29.9		51.54	-32.1		15.4004	-33.1		2.6694	n.d.		n.d.		28.807		3.2
							Terminalia	prunioides		This study		13.7725	-31.8		57.0858	-33		26.9461	-35.2		2.19561	n.d.		n.d.		29.3513		3.4
	Fabaceae		Caesalpinioideae		Detarieae		Colophospermum	mopane		This study		6.81411	-29.3		6.51524	-30.1		48.2168	-30.6		38.4539	-30.9		-30.5942		31.3662		1.6
										This study		10.3125	n.d.		8.59375	-31.9		43.75	-32.3		37.3438	-30.4		n.d.		31.1625		1.9
			Faboideae		Sesbanieae		Sesbania	sesban		Cryer (2012)		39.3089	-34.9		36.2851	-36.3		16.6307	-37.1		7.77538	-33.5		-35.665		28.8575		3.6
			Mimosoideae		Acacieae		Acacia	albida		Cryer (2012)		88.074	-35.8		10.477	-36.1		1.13687	n.d.		0.312082	n.d.		n.d.		27.2737		0.3
								erioloba		Vogts et al. (2009)		38.0583	-34.4		46.0194	-34.6		11.7476	-36.3		4.17476	-34.8		-34.7319		28.6408		1.9
								karroo		Vogts et al. (2009)		22.4751	-32.3		59.744	-32.2		16.9275	-33.7		0.853485	n.d.		n.d.		28.9232		1.5
										Cryer (2012)		n.d.	-29.6		n.d.	-31.4		n.d.	-30.6		*	n.d.		n.d.		n.d.		1.8
								kirikii		Vogts et al. (2009)		4.61279	n.d.		15.9933	-35.5		59.2593	-36.1		20.1347	-36.1		n.d.		30.8983		0.6
								luederitzii		Vogts et al. (2009)		12.8006	-31.4		62.1412	-31.3		22.4205	-30.1		2.6377	-31.4		-31.0464		29.2979		1.3
								mellifera		Vogts et al. (2009)		17.6029	-31.6		17.8891	-32.6		57.2451	-32.8		7.26297	n.d.		n.d.		30.0834		1.2
										Vogts et al. (2009)		36.5754	-32.6		23.2964	-33.6		30.926	-33		9.2021	n.d.		n.d.		29.2551		1
								nebrownii		Vogts et al. (2009)		27.897	-30.6		33.9056	-32.3		27.0386	-33.9		11.1588	n.d.		n.d.		29.4292		3.3
								robusta		This study		n.d.	-31.9		n.d.	-33.8		n.d.	-34.3		n.d.	n.d.		n.d.		n.d.		2.4
								senegal		This study		14.7994	-34.5		48.9627	-32.3		29.2531	-34.9		6.98479	-35.2		-33.5887		29.5685		2.9
								sieberiana		Cryer (2012)		5.92844	-35.7		75.3894	-34.3		17.5588	-33.5		1.12338	-33		-34.2279		29.2775		2.7
								tortillis		This study		n.d.	-34.7		n.d.	-33.5		n.d.	-35.4		n.d.	n.d.		n.d.		n.d.		1.9
					Mimoseae		Dichrostachys	cinera		Vogts et al. (2009)		8.59133	-32.9		22.291	-33.8		53.3282	-32.5		15.7895	-31.6		-32.682		30.5263		2.2
							Leucaena	leucocephala		This study		20.3593	-32.4		50.7485	-34.9		25.7485	-33.6		3.14371	n.d.		n.d.		29.2335		2.5
	Loranthaceae		-		Lorantheae		Tapinanthus	sp.		This study		13.095	-37.1		62.2839	-37.3		24.0381	-35.7		0.582964	n.d.		n.d.		29.2422		1.6
	Malvaceae		Bombacoideae		Adansonieae		Adansonia	digitata		This study		11.7195	-35.3		21.5114	-36		45.3974	-36		21.3717	-37		-36.1317		30.5284		1.7
			Grewioideae		Grewieae		Grewia	flavescens		Vogts et al. (2009)		2.02304	n.d.		39.4629	-35.4		54.2502	-36.1		4.26381	-35.5		n.d.		30.2151		0.9
	Moraceae		-		Moreae		Morus	alba		This study		7.49001	-35.5		15.3129	-35.5		55.2597	-37.4		21.9374	-38.1		-37.1203		30.8329		2.6
	Rhamnaceae		-		Paliureae		Ziziphus	mucronata		This study		46.2567	-32.6		23.262	-30.9		22.7273	-33.8		7.75401	-34.4		-32.6168		28.8396		3.5
										Cryer (2012)		7.9146	-29.8		16.9722	-29.8		28.1001	-28.7		47.0132	n.d.		n.d.		31.2842		1.1
								spina-christi		This study		25.5361	-32.3		25.1462	-32.3		26.5107	-35		22.807	-35.4		-33.7228		29.9318		3.1
	Salvadoraceae		-		-		Salvadora	persica		Vogts et al. (2009)		15.7143	-34.3		26.4286	-36.3		51.0714	-35.5		6.78571	-34.1		-35.4279		29.9786		2.2
	Tamaricaceae		-		-		Tamarix	usneoides		This study		6.96143	-28.9		24.4591	-28.1		65.2869	-27.4		3.29257	n.d.		n.d.		30.2982		1.5
	Zygophyllaceae		Tribuloideae		-		Balanites	aegyptiaca		Cryer (2012)		41.8994	-30.8		35.4749	-31.5		18.1564	-31.8		4.46927	n.d.		n.d.		28.7039		1
	Combretaceae		-		-		Terminalia	brachystemma		This study		10.4767	-32.779		78.0631	-31.134		11.1278	-29.32		0.332389	n.d.		-31.1044		29.0263		3.5
	Fabaceae		-		-		-	sp.		Badewien et al. (2015)		17.2297	-36.873		24.0511	-37.092		44.2438	-37.819		14.4753	n.d.		-37.424		30.1193		0.946
	Melastomataceae		-		-		Dissotis	sp.		Badewien et al. (2015)		1.43392	n.d.		7.71276	-34.091		46.278	-34.201		44.5753	-33.835		-34.0269		31.6799		0.366
			-		-					Badewien et al. (2015)		2.22965	n.d.		6.16143	-36.213		54.7486	-35.979		36.8603	-35.304		-35.7393		31.5248		0.909
	Proteaceae		-		-		Protea	sp.		Badewien et al. (2015)		40.161	-31.475		23.8949	-32.067		28.8716	-30.233		7.07253	n.d.		-31.2413		29.0571		1.834
	Rubiaceae		-		-		-	sp.		Badewien et al. (2015)		1.68507	n.d.		30.9722	-34.508		57.43	-34.994		9.91279	-35.715		-34.9136		30.5114		1.207
							Total	Median:				13.1818	-32.35		26.4286	-33.25		29.2531	-33.6		7.26297	-34.1		-33.7228		29.7515		1.867
							42	MAD:				6.22039	2.25		11.1157	1.8		13.8527	1.8		5.06736	1.3		1.70505		0.730629		0.75
	Amaranthaceae		Amaranthoideae		-		Achyranthes	aspera		Vogts et al. (2009)		5.53728	n.d.		13.6513	-33.7		25.9868	-34.2		54.8246	-35.4		n.d.		31.602		1.8
							Digera	muricata		Vogts et al. (2009)		12.5786	-37.4		21.8191	-36.4		56.12	-37.7		9.48234	-37.6		-37.3691		30.2501		1.3
	Apocynaceae		Asclepiadoideae		-		Leptadenia	reticulata		Cryer (2012)		19.287	-36.3		38.7048	-37.4		34.5944	-37.85		7.41387	-37.6		-37.3583		29.6027		1.55
	Asteraceae		Asteroideae		Senecioneae		Crassocephalum	mannii		Vogts et al. (2009)		8.33006	n.d.		13.2809	-33.8		65.6189	-35.1		12.7701	-34.6		n.d.		30.6566		1.3
					Coreopsideae		Bidens	pilosa		This study		6.15451	-36.3261		41.6142	-36.9301		48.1337	-36.8335		4.0976	-35.0158		-36.768		30.0035		1.91424
										This study		6.17329	-36.2305		41.4082	-36.9881		48.3359	-36.7668		4.08254	-35.2159		-36.762		30.0066		1.77219
					Millerieae		Tridax	procumbens		Cryer (2012)		3.656	-31.6		31.1591	-33.2		55.5879	-33.9		9.59701	-33.4		-33.5498		30.4225		2.3
					Heliantheae		Xanthium	brasilicum		Vogts et al. (2009)		19.8582	n.d.		41.6667	-33.7		30.4965	-34.8		7.97872	-34.7		n.d.		29.5319		1.1
	Boraginaceae		Heliotropioideae		-		Heliotropium	sp.		Vogts et al. (2009)		11.1111	-34		38.1898	-36		26.9316	-36.2		23.7675	-36.2		-35.8792		30.2671		2.2
	Convolvulaceae		-		Ipomoeeae		Ipomoea	cordofana		Vogts et al. (2009)		5.44244	-33.7		8.26155	-34.6		35.3955	-36.7		50.9005	-37.1		-36.5668		31.6351		3.4
	Cyperaceae		Cyperoideae		Cypereae		Cyperus	denudatus		This Study		27.2744	-32.3819		35.9296	-32.8572		31.9677	-32.7915		4.82828	-31.2313		-32.628		29.287		1.82582
								marginatus		This Study		27.2348	-32.6043		35.8599	-32.7356		32.0028	-32.5367		4.90254	-30.9208		-32.5472		29.2915		1.81488
								sp.		This Study		0.771978	n.d.		17.5596	-34.6		69.9735	-33.3		11.6949	-33.6		n.d.		30.8518		1.3
										This Study		4.44444	-35.2		19.7561	-36.3		51.2195	-35.4		24.5799	n.d.		n.d.		30.9187		1.1
					Fuireneae		Schoenoplectus	corymbosus		Cryer (2012)		5.04173	n.d.		14.6631	-35.4		48.7689	-36.4		31.5263	-36.5		-36.2788		31.1356		1.1
								paludicola		Cryer (2012)		2.35208	n.d.		31.3221	-35.3		45.9167	-34		20.4091	-33.5		-34.3125		30.6877		1.8
					-		Tetraria	thermalis		Cryer (2012)		1.63561	-30.55		9.16494	-29.8		65.8868	-29.05		23.3126	-29.9		-29.3414		31.2175		1.5
							Tetraria	ustulata		Cryer (2012)		1.21491	-28.1		18.0701	-31.1		72.0709	-30.8		8.64404	-31.1		-30.8473		30.7629		3
	Fabaceae		Faboideae		Desmodieae		Desmodium	sp.		Cryer (2012)		7.1028	-34.7		11.3084	-35.2		59.1277	-36		22.4611	-35.1		-35.615		30.9389		1.3
					Phaseoleae		Vigna	sp.		Vogts et al. (2009)		7.47908	-36.2		15.8473	-36.6		43.8808	-39.4		32.7929	-38.4		-38.389		31.0397		3.2
	Lamiaceae		Nepetoideae		Ocimeae		Ocimum	basilicum		Vogts et al. (2009)		9.83789	-30.3		17.6105	-29.1		30.0022	-31.8		42.5494	-32.1		-31.3046		31.1053		3
	Malvaceae		Malvoideae		Malveae		Abutilon	graveolens		Vogts et al. (2009)		16.6124	-32.9		37.785	-33.6		34.3648	-34.4		11.2378	-33.5		-33.7474		29.8046		1.5
							Total	Median:				6.63805	-33.85		20.7876	-34.6		47.0252	-34.95		12.2325	-34.7		-35.615		30.6721		1.7861
							22
	Badewien, T., Vogts, A. & Rullkötter, J. n-Alkane distribution and carbon stable isotope composition in leaf waxes of C3 and C4 plants from Angola. Org. Geochem. 89, 71–79 (2015).
	Bezabih, M., Pellikaan, W. F. & Hendriks, W. H. Using n-alkanes and their carbon isotope enrichments (δ13C) to estimate the botanical composition of pasture mixes from the Mid Rift Valley grasslands of Ethiopia. Livest. Sci. 142, 298–304 (2011a).
	Bezabih, M., Pellikaan, W. F., Tolera, A. & Hendriks, W. H. Evaluation of n-alkanes and their carbon isotope enrichments (δ13C) as diet composition markers. Animal 5, 57–66 (2011b).
	Cryer, D. Epicuticular Waxes as Continental Paleovegetational Biomarkers. (University of Bristol, 2012).
	Rommerskirchen, F., Plader, A., Eglinton, G., Chikaraishi, Y. & Rullkötter, J. Chemotaxonomic significance of distribution and stable carbon isotopic composition of long-chain alkanes and alkan-1-ols in C4 grass waxes. Org. Geochem. 37, 1303–1332 (2006).
	Vogts, A., Moossen, H., Rommerskirchen, F. & Rullkötter, J. Distribution patterns and stable carbon isotopic composition of alkanes and alkan-1-ols from plant waxes of African rain forest and savanna C3 species. Org. Geochem. 40, 1037–1054 (2009).
