# Supplementary material for: Isotopic variance among plant lipid homologues correlates with biodiversity patterns of their source communities
Source: PLoS One. 2019 Feb 27;14(2):e0212211. doi: 10.1371/journal.pone.0212211 (PMC6392421; doi:10.1371/journal.pone.0212211)
Supplement: S3 Table — (XLS) [file pone.0212211.s004.xls]

## Sheet: Sheet1
	SI Table 3: Measured biomarker n-alkane δ13C values and LEWIS values derived from data reported by Schefuß et al. (2011) and Wang et al. (2013) for sediment cores recovered from off the Zambezi River mouth (SI Discussion 8).
	Wang et al. (2013): GIK16160-3							Schefuss et al. (2011): GeoB9307-3
	Age [ka BP]	d13C27	d13C29	d13C31	d13C33	LEWIS		Age model [ka]	d13C29	d13C31	d13C33	LEWIS
	0.471	-28.4	-29	-28.2	-26.6	2.4		0.611	-27.7	-26.9	-24.7	3
	0.962	-29.5	-29.5	-29.4	-27.2	2.3		1.036	-30	-29.3	-27.3	2.7
	1.558	-29.7	-29.9	-29.3	-28	1.9		1.462	-28.7	-28.2	-27.1	1.6
	2.153	-29.1	-30.2	-30.1	-27.8	2.4		1.888	-29.3	-29	-28.1	1.2
	2.55	-29.6	-30.2	-29.9	-28.6	1.6		2.314	-28.2	-28	-26	2.2
	2.967	-30	-29.8	-29.2	-28.2	1.8		3.037	-28.6	-29.3	-27.9	1.4
	3.344	-28.5	-29.1	-29	-27.7	1.4		3.372	-28.4	-28.8	-27.3	1.5
	3.756	-27.6	-28.7	-28.6	-27.2	1.5		3.706	-27.4	-27.7	-26.9	0.8
	3.949	-28.3	-28.9	-29.1	-28	1.1		4.676	-30.1	-30.5	-30.5	0.4
	4.439	-29.2	-29.4	-29.2	-27.9	1.5		4.926	-28.3	-28.7	-27.8	0.9
	4.981	-28.9	-29.2	-29.2	-27.8	1.4		5.177	-30.9	-30.4	-29	1.9
	5.489	-28.3	-28.8	-29	-27.4	1.6		5.427	-31	-29.8	-28.7	2.3
	6.68	-28.3	-29	-29.1	-27.5	1.6		5.678	-30.2	-29.1	-28.4	1.8
	6.897	-29.7	-29.3	-30.1	-28.6	1.5		6.179	-28.9	-28.7	-27.8	1.1
	7.093	-29.7	-28.8	-29.1	-28.9	0.9		6.429	-29.9	-30.7	-29.5	1.2
	7.985	-28.3	-29.7	-28.9	-27.6	2.1		6.694	-28.7	-29.2	-29	0.5
	8.42	-28.5	-29.3	-29.3	-27.6	1.7		6.981	-29.3	-28.2	-27.1	2.2
	8.828	-28	-29	-28.9	-27.4	1.6		7.555	-29.7	-29.3	-28.8	0.9
	8.944	-30.2	-29.9	-30.4	-28.8	1.6		8.416	-31.5	-31.1	-29.4	2.1
	9.25	-29.5	-29.9	-30.2	-28.7	1.5		8.703	-30.7	-29.6	-28.8	1.9
	9.483	-29.8	-29.9	-30.2	-28.8	1.6		8.99	-30	-29.4	-28	2
	9.906	-28.2	-28.8	-29.5	-27.8	1.7		9.277	-29.5	-30.9	-30.5	1.4
	10.556	-28.7	-29.3	-29.5	-28.2	1.3		9.517	-30.3	-29.8	-28.6	1.7
	11.028	-29	-29.5	-29.6	-27.8	1.8		9.685	-27.1	-28.8	-28	1.7
	11.461	-28.1	-29	-28.6	-26.5	2.5		9.854	-30.2	-29.9	-28.6	1.6
	12.063	-29.4	-30.1	-29.8	-27.9	2.2		10.022	-29.3	-29.7	-28.2	1.5
	13.164	-28.3	-29.6	-29.2	-27.3	2.3		10.191	-30.7	-30.5	-29.4	1.3
	13.413	-28.8	-29.8	-28.9	-27	2.8		10.359	-29.1	-29.4	-28.2	1.2
	13.744	-29.3	-30	-29.2	-26.7	3.3		10.489	-31.1	-30.6	-30	1.1
	14.406	-27.7	-29.9	-29.2	-26	3.9		10.562	-29.4	-30.1	-28.8	1.3
	15.244	-29.3	-31.7	-30	-26.7	5		10.635	-29.6	-29.9	-28.7	1.2
	15.785	-28.5	-31.8	-30.4	-26.6	5.2		10.708	-29.7	-29.7	-28.4	1.3
	16.145	-28.6	-31.8	-30.3	-27	4.8		10.781	-28.6	-29.2	-27.6	1.6
	16.524	-29	-31.8	-30.6	-27.5	4.3		10.854	-28.9	-29.1	-27.8	1.3
	16.87	-29.2	-31.3	-29.5	-27	4.3		10.969	-30.2	-30.1	-28.7	1.5
	17.158	-27.9	-30.9	-29.1	-25.7	5.2		11.02	-28.4	-28.5	-27.5	1
	17.518	-27.6	-30.7	-28.4	-25.5	5.2		11.122	-29.2	-29.5	-28.3	1.2
	17.878	-27.3	-30.4	-28.3	-25	5.4		11.173	-30.3	-30.7	-28.7	2
	18.598	-27.6	-30.9	-28.6	-24.9	6		11.224	-28.2	-28.6	-27.1	1.5
	18.944	-27.2	-29.9	-27.7	-24.3	5.6		11.275	-27.5	-28	-26.6	1.4
	19.318	-27	-30.3	-27.9	-24.4	5.9		11.323	-29.6	-29.7	-28.2	1.5
	19.592	-27.9	-30.1	-27.9	-25.2	5.149		11.374	-28.3	-27.9	-25.8	2.5
	20.11	-26.9	-29.8	-27.8	-24.9	4.945		11.402	-28.7	-28.1	-26.2	2.5
	21.232	-29	-30.7	-28.8	-25.8	4.85		11.431	-29.4	-29.2	-26.8	2.6
	21.943	-27.3	-29.7	-27.4	-24.8	4.9		11.459	-27.9	-27.2	-25.8	2.1
	22.691	-26.2	-29.5	-27	-23.9	5.6		11.487	-30.2	-29.7	-27.8	2.4
	23.439	-27.3	-30.1	-28	-24.8	5.3		11.527	-28.9	-27.5	-25.8	3.1
	24.29	-26.7	-29.2	-26.8	-23.7	5.5		11.583	-29.4	-29.1	-26.5	2.9
	25.561	-27	-29.2	-27.1	-24.2	5		11.64	-29.9	-29.2	-27.1	2.8
								11.696	-30	-30.2	-27.3	2.9
								11.752	-31	-30.8	-29.4	1.6
								11.809	-29.2	-28.8	-27.1	2.1
								11.865	-29.3	-29.7	-26.8	2.9
								11.921	-28.2	-27.1	-25	3.2
								12.034	-29.1	-28.5	-26.1	3
								12.074	-28.2	-27.2	-25.6	2.6
								12.106	-30.8	-29.7	-26.5	4.3
								12.122	-28.5	-28	-26.2	2.3
								12.139	-29.6	-29	-28	1.6
								12.155	-30.5	-28.8	-26.6	3.9
								12.171	-28.6	-28	-26.1	2.5
								12.187	-29.9	-28.4	-27.1	2.8
								12.203	-28.3	-27.9	-26	2.3
								12.236	-29	-27.6	-24.9	4.1
								12.292	-29.5	-28.4	-26.3	3.2
								12.406	-28.8	-27.6	-26.1	2.7
								12.463	-29.6	-26.8	-27.1	2.8
								12.519	-28.6	-27.2	-25.4	3.2
								12.576	-27	-26.6	-24.7	2.3
								12.637	-29.3	-28.2	-26.2	3.1
								12.769	-28.7	-27.7	-26	2.7
								12.902	-27.2	-27.1	-25.8	1.4
								12.969	-28.1	-28.1	-26.3	1.8
								13.035	-28.9	-28.9	-27.8	1.1
								13.101	-28.3	-27.6	-26.3	2
								13.168	-30.7	-29.2	-26.7	4
								13.229	-29.9	-29	-27.1	2.8
								13.281	-28.8	-28.4	-27.3	1.5
								13.455	-28.5	-27.8	-26.3	2.2
								13.547	-28.1	-27.6	-25.9	2.2
								13.64	-30	-29.4	-27.3	2.7
								13.733	-30.8	-29.6	-27.5	3.3
								13.918	-28.1	-27.9	-25.5	2.6
								14.041	-28.3	-27.6	-26.2	2.1
								14.21	-27.7	-27.5	-25.8	1.9
								14.548	-27.9	-27.4	-25.9	2
								14.717	-28.8	-28.1	-25.9	2.9
								14.877	-28.6	-27.5	-24.8	3.8
								15.17	-28.4	-27.1	-24.9	3.5
								15.462	-29.9	-26.8	-23.6	6.3
								15.612	-26.5	-25	-24.2	2.3
								15.923	-27.8	-25.9	-23.7	4.1
								16.078	-28.5	-26	-23.5	5
								16.388	-27.7	-25.5	-22.9	4.8
								16.543	-28.3	-25.8	-23.2	5.1
								16.653	-30.4	-28.6	-26.2	4.2
								16.695	-28.8	-26.3	-23.5	5.3
								16.779	-29.5	-27.1	-25.5	4
								16.821	-27.7	-25.3	-23	4.7
								16.863	-28	-25.1	-22.4	5.6
								16.905	-27.7	-25	-22.4	5.3
								16.947	-29	-27.7	-25.1	3.9
